# Supplementary material for: MicroRNA-409-3p promotes osteoblastic differentiation via activation of Wnt/β-catenin signaling pathway by targeting SCAI
Source: Oxford University Press journal article supplement (doi:10.1042/bsr20201902), 2020-12-05
Supplement: bsr-2020-1902_supp.pdf [file bsr-2020-1902_supp.pdf]

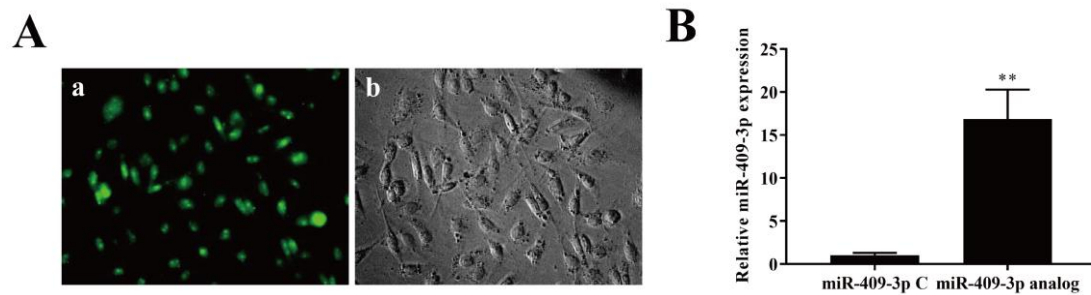

**Supplementary Figure S1** (A) The transfection efficiency was evaluated by observing GFP fluorescence, a: green fluorescence; b: white light. (B) MiR-409-3p was highly increased after transfection of miR-409-3p analog compared to the cells transfected with miR-409-3p control.
